# Supplementary material for: The Cyclin-Dependent Kinase 5 Inhibitor Peptide Inhibits Herpes Simplex Virus Type 1 Replication
Source: PubMed Central journal article supplement (PMC6362106; doi:10.1038/s41598-018-37989-3), 2019-02-04
Supplement: 41598_2018_37989_MOESM1_ESM.pdf [file 41598_2018_37989_MOESM1_ESM.pdf]

# The Cyclin-Dependent Kinase 5 Inhibitor Peptide Inhibits Herpes Simplex Virus Type 1 Replication

**Adrian Man <sup>1,2</sup>; Mark Slevin <sup>\*3,4</sup>, Eugen Petcu <sup>5</sup>, Cornel Fraefel <sup>1</sup>**

1. *Institute of Virology, University of Zurich, Zurich, Switzerland*
2. *Department of Microbiology, University of Medicine and Pharmacy of Tîrgu Mureş, Romania*
3. *University of Medicine and Pharmacy of Tîrgu Mureş, Romania*
4. *School of Healthcare Science, Manchester Metropolitan University, Manchester, UK*
5. *Griffith University, Gold Coast, Brisbane, Australia*

\*Correspondence to: [M.A.Slevin@mmu.ac.uk](mailto:M.A.Slevin@mmu.ac.uk)

|                                                                   |            |            |            |            |
|-------------------------------------------------------------------|------------|------------|------------|------------|
| 10                                                                | 20         | 30         | 40         | 50         |
| MGTVLSLSPS                                                        | YRKATLFEDG | AATVGHYTA  | QNSKNAKDKN | LKRHSIISVL |
| 60                                                                | 70         | 80         | 90         | 100        |
| PWKRIVAVSA                                                        | KKKNSKKVQP | NSSYQNNITH | LNNENLKKSL | SCANLSTFAQ |
| 110                                                               | 120        | 130        | 140        | 150        |
| PPPAQPPAPP                                                        | ASQLSGSQTG | GSSSVKKAPH | PAVTSAGTPK | RVIVQASTSE |
| 160                                                               | 170        | 180        | 190        | 200        |
| LLRCLGEFLC                                                        | RRCYRLKHL  | PTDPVLWLR  | VDRSLLLQGW | QDQGFITPAN |
| 210                                                               | 220        | 230        | 240        | 250        |
| VVFLYMLCRD                                                        | VISSEVGS   | ELQAVLLTCL | YLSYSYMGNE | ISYPLKPFLV |
| 260                                                               | 270        | 280        | 290        | 300        |
| ESCKEAFWDR                                                        | CLSVINLMSS | KMLQINADPH | YFTQVFSDLK | NESGQEDKKR |
| 307                                                               |            |            |            |            |
| LLLGLDR                                                           |            |            |            |            |
| ■ p10 ■ p25 ■ CIP                                                 |            |            |            |            |
| CIP gene sequence (direct strand +):                              |            |            |            |            |
| TGCCTGGGTGAGTTTCTCTGCCGCCGGTGCTACCGCCTGAAGCACCTGTCCCCACGGACCCCGT  |            |            |            |            |
| GCTCTGGCTGCGCAGCGTGGACCGCTCGCTGCTTCTGCAGGGCTGGCAGGACCAGGGCTTCATCA |            |            |            |            |
| CGCCGGCCAACGTGGTCTTCCTCTACATGCTCTGCAGGGATGTTATCTCCTCCGAGGTGGGCTCG |            |            |            |            |
| GATCACGAGCTCCAGGCCGTCTGCTGACATGCCTGTACCTCTCCTACTCCTACATGGGCAACGA  |            |            |            |            |
| GATCTCCTACCCGCTCAAGCCCTTCTGGTGGAGAGCTGCAAGGAGGCCTTTTGGGACCGTTGCC  |            |            |            |            |
| TCTCTGTCATCAACCTCATGAGCTCAAAGATGCTGCAGATAAATGCCGACCCAT            |            |            |            |            |

Supplemental Figure 1. CIP structure. CIP is a 125 amino acid peptide with a molecular weight of 12.5 kDa.

| (A) RT-PCR results |           | (B) qRT-PCR results |                 |                   |  |
|--------------------|-----------|---------------------|-----------------|-------------------|--|
| Cell lines         | Replicate | CT values           |                 |                   |  |
|                    |           | rAAV-CIP-CFP        | rAAV-nlsCIP-CFP | rAAV-CIP-IRES-CFP |  |
| HeLa               | 1         | 29.73               | 33.71           | 31.19             |  |
|                    | 2         | 27.43               | 31.38           | 28.94             |  |
|                    | 3         | 28.57               | 32.56           | 30.06             |  |
| HeLa + wtHSV-1     | 1         | 30.59               | 34.09           | 31.67             |  |
|                    | 2         | 30.39               | 34.35           | 31.78             |  |
|                    | 3         | 30.06               | 33.50           | 31.12             |  |
| 293T               | 1         | 22.41               | 27.00           | 23.79             |  |
|                    | 2         | 22.30               | 26.83           | 23.79             |  |
|                    | 3         | 21.83               | 26.41           | 23.22             |  |

Supplemental Figure 2. Data showing PCR results for CIP expression by electrophoresis of the RT-PCR products (A) or by qRT-PCR CT values (B).

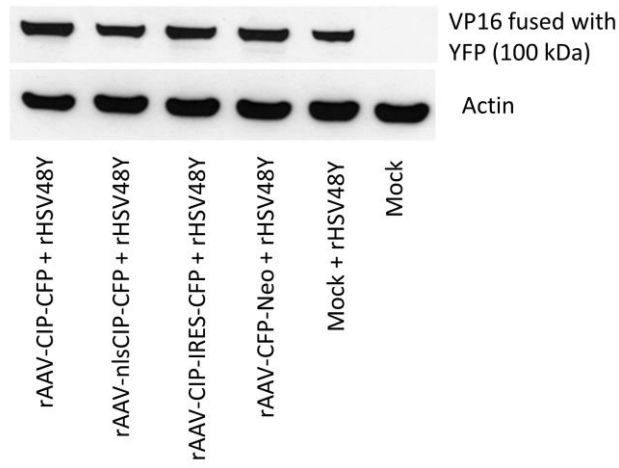

Supplemental Figure 3 (cropped image). Western-blot for HeLa cells co-infected with rAAV vectors and rHSV48Y.

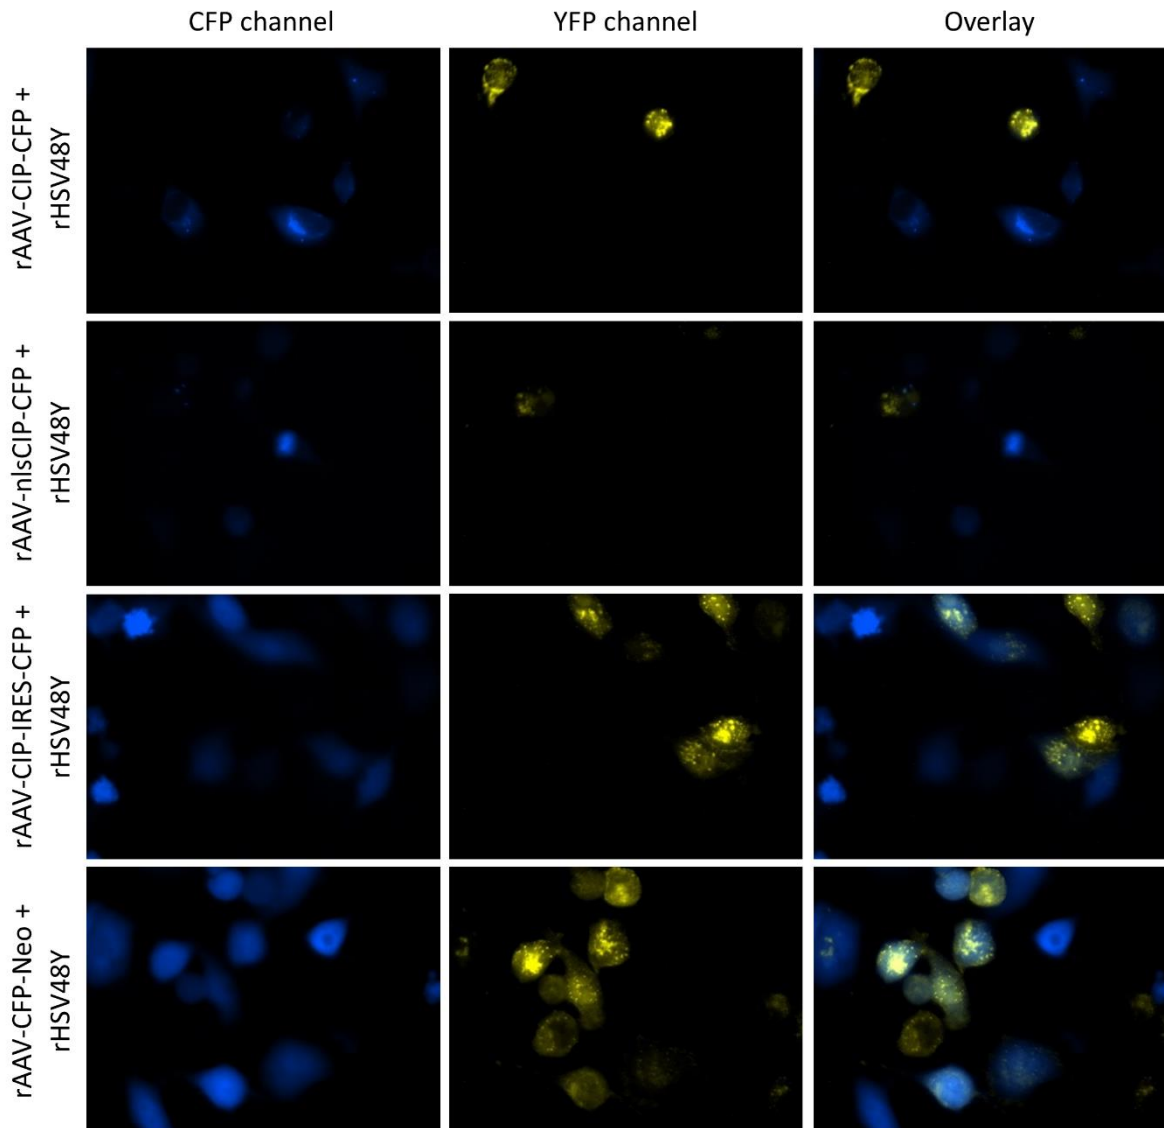

Supplemental Figure 4. Suggestive images from epifluorescence microscopy following the coinfection of rAAV-CIP vectors and rHSV48Y
